# Supplementary material for: Enhancement of antibiotics antimicrobial activity due to the silver nanoparticles impact on the cell membrane
Source: PubMed Central journal article supplement (PMC6839893; doi:10.1371/journal.pone.0224904), 2019-11-08
Supplement: pone.0224904.s001.pdf [file pone.0224904.s001.pdf]

**A**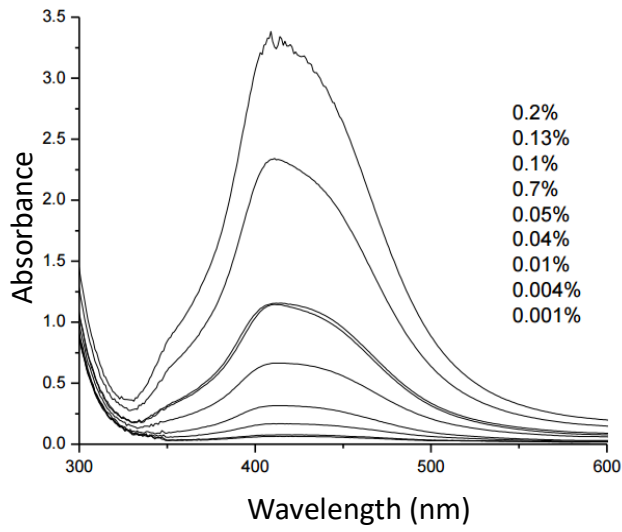**B**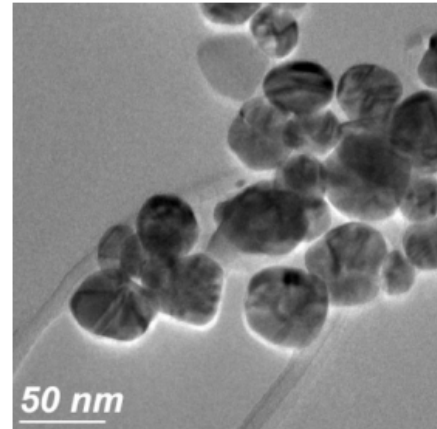**C**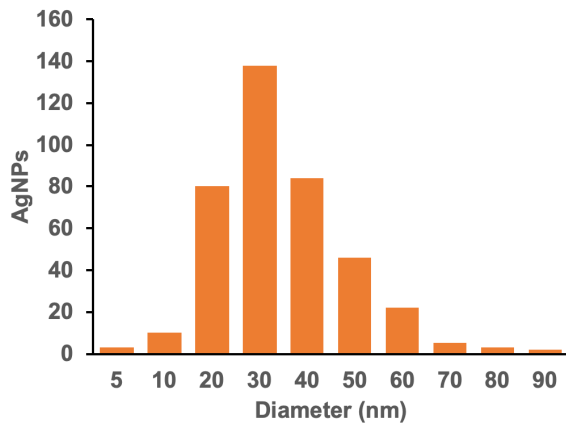**D**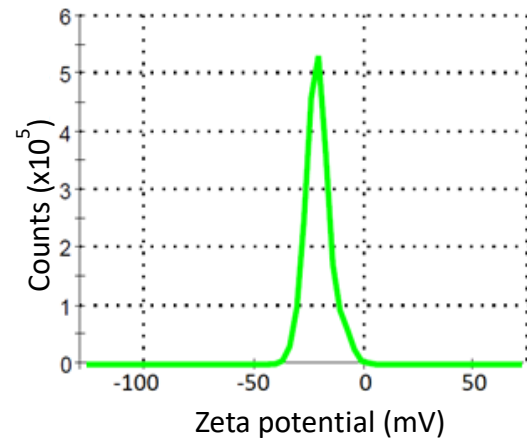

**S1 Fig. Silver nanoparticles characterization.** A) UV-Vis profile. B) TEM micrograph of AgNPs. C) Average diameter of AgNPs. D) Zeta potential analysis
