# Supplementary material for: Enhancement of antibiotics antimicrobial activity due to the silver nanoparticles impact on the cell membrane
Source: PubMed Central journal article supplement (PMC6839893; doi:10.1371/journal.pone.0224904), 2019-11-08
Supplement: pone.0224904.s002.pdf [file pone.0224904.s002.pdf]

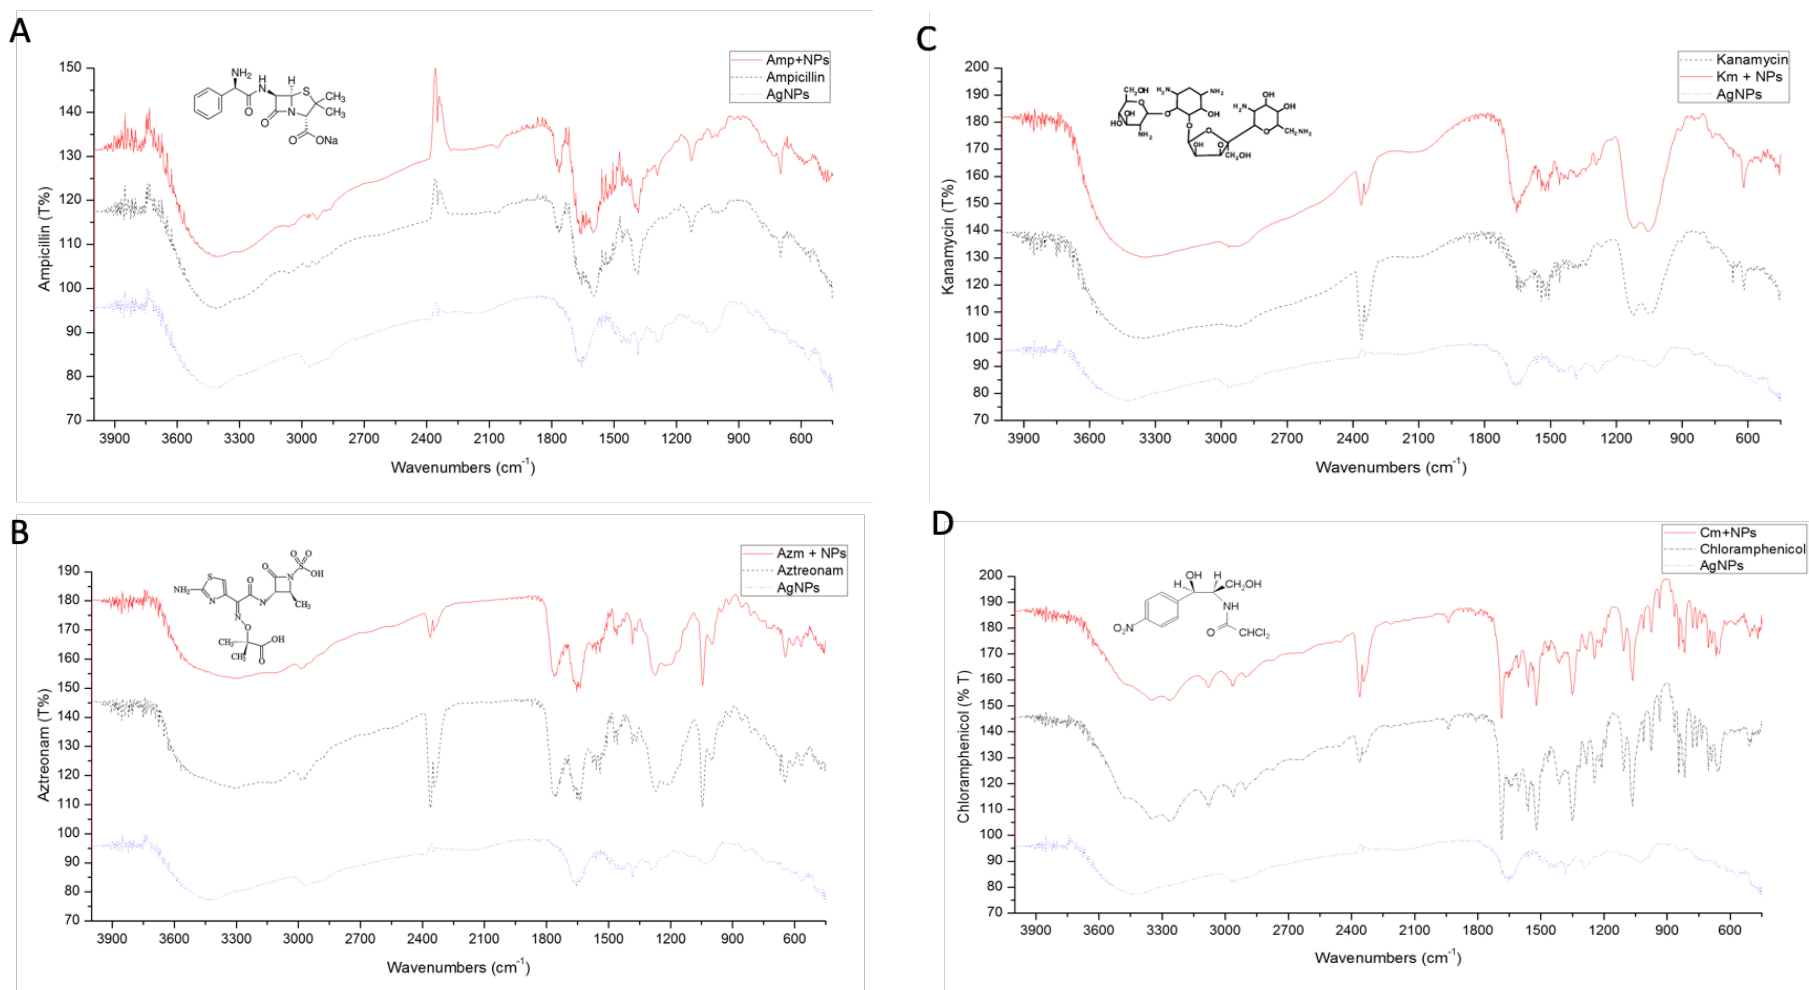

**S2 Fig. FT-IR analysis of the AgNPs, antibiotics and combined treatments.** A) Ampicillin (Amp); B) Aztreonam (Azm); C) Kanamycin (Km); and D) Chloramphenicol (Cm). Transmission spectra of the AgNPs-antibiotic combination were similar to those of the non-combined AgNPs and antibiotics.
