# Supplementary material for: Enhancement of antibiotics antimicrobial activity due to the silver nanoparticles impact on the cell membrane
Source: PubMed Central journal article supplement (PMC6839893; doi:10.1371/journal.pone.0224904), 2019-11-08
Supplement: pone.0224904.s003.pdf [file pone.0224904.s003.pdf]

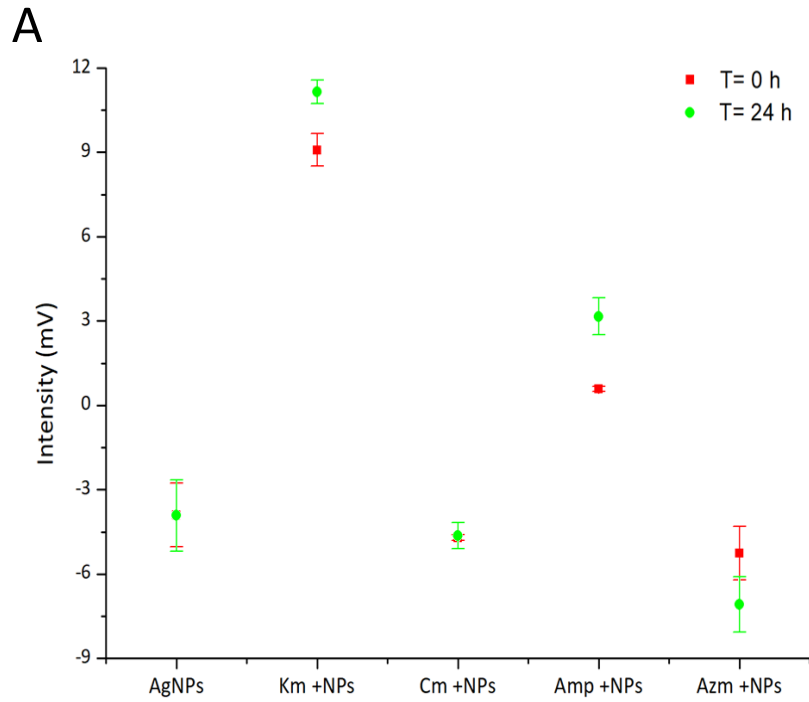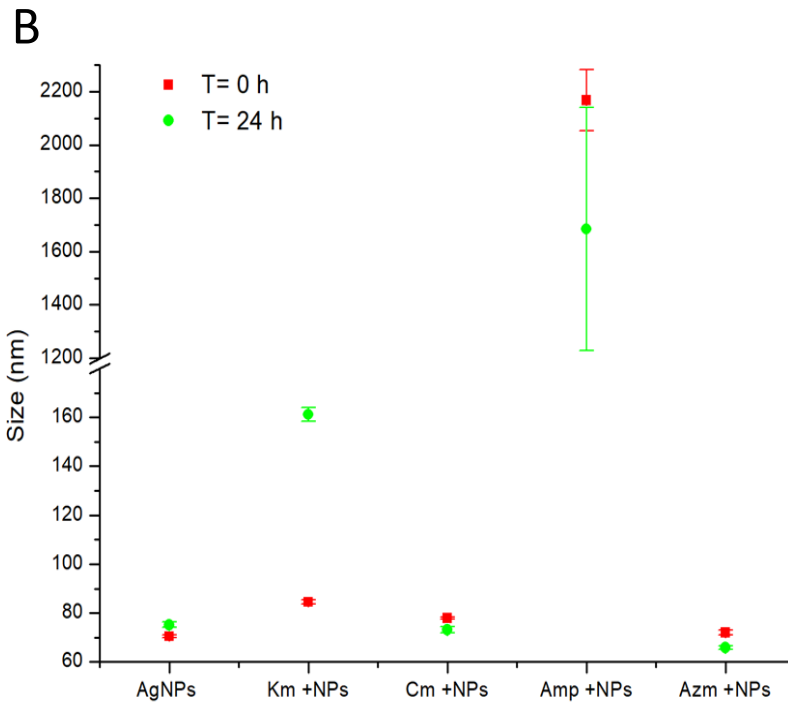

**S3 Fig. DLS analysis of the combined AgNPs and antibiotic treatments at 0 (red) and after 24 hours of incubation (green). The charge (A) and size (B) of AgNPs are different for each antibiotic.**
