# Supplementary material for: Enhancement of antibiotics antimicrobial activity due to the silver nanoparticles impact on the cell membrane
Source: PubMed Central journal article supplement (PMC6839893; doi:10.1371/journal.pone.0224904), 2019-11-08
Supplement: pone.0224904.s004.pdf [file pone.0224904.s004.pdf]

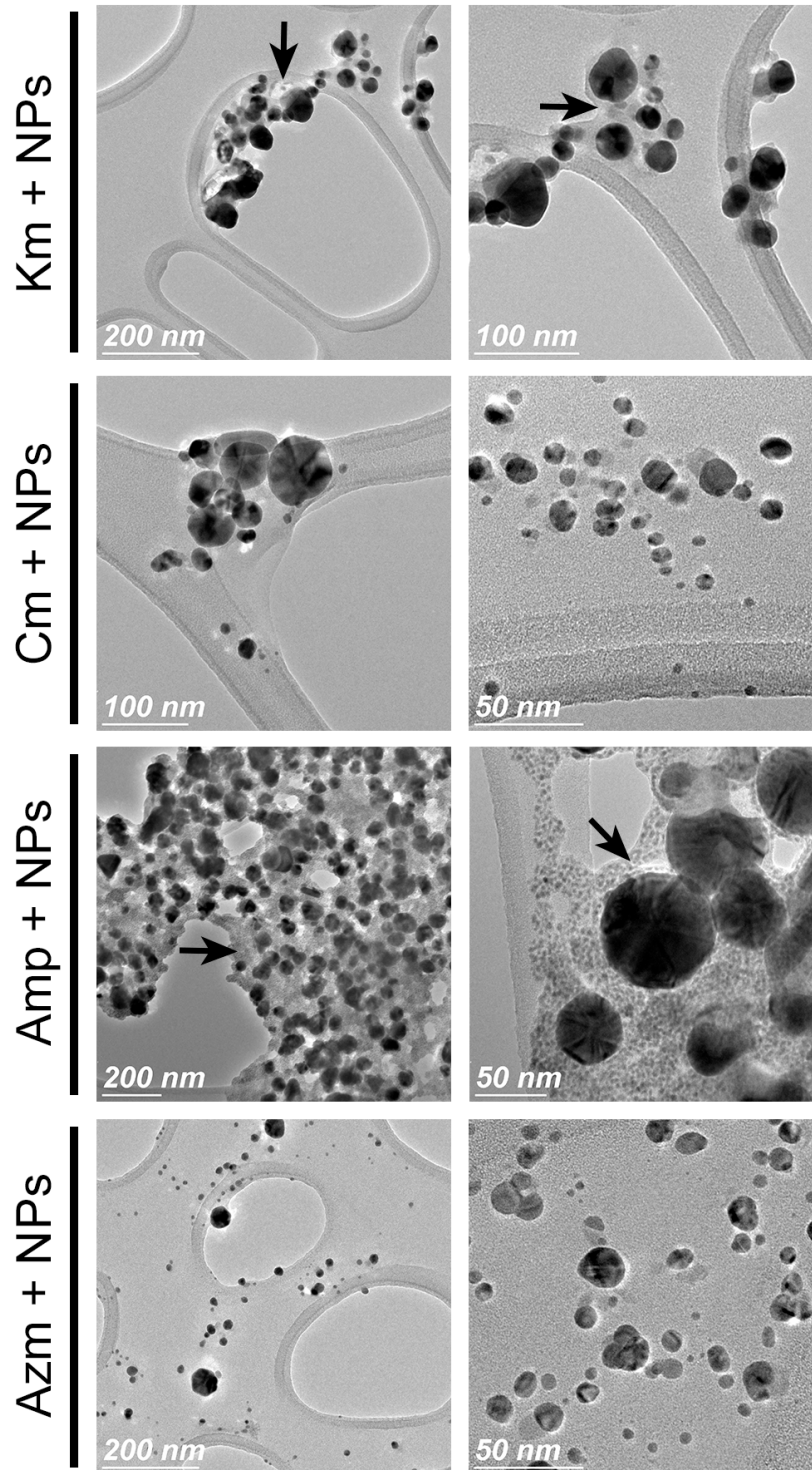

**S4 Figure. TEM images of the combined AgNPs and antibiotic treatments. An aggregative effect was observed for Km + AgNPs and Amp + AgNPs combinations (marked with arrows). Images were taken after 24 hours of incubation.**
