# Supplementary material for: Enhancement of antibiotics antimicrobial activity due to the silver nanoparticles impact on the cell membrane
Source: PubMed Central journal article supplement (PMC6839893; doi:10.1371/journal.pone.0224904), 2019-11-08
Supplement: pone.0224904.s005.pdf [file pone.0224904.s005.pdf]

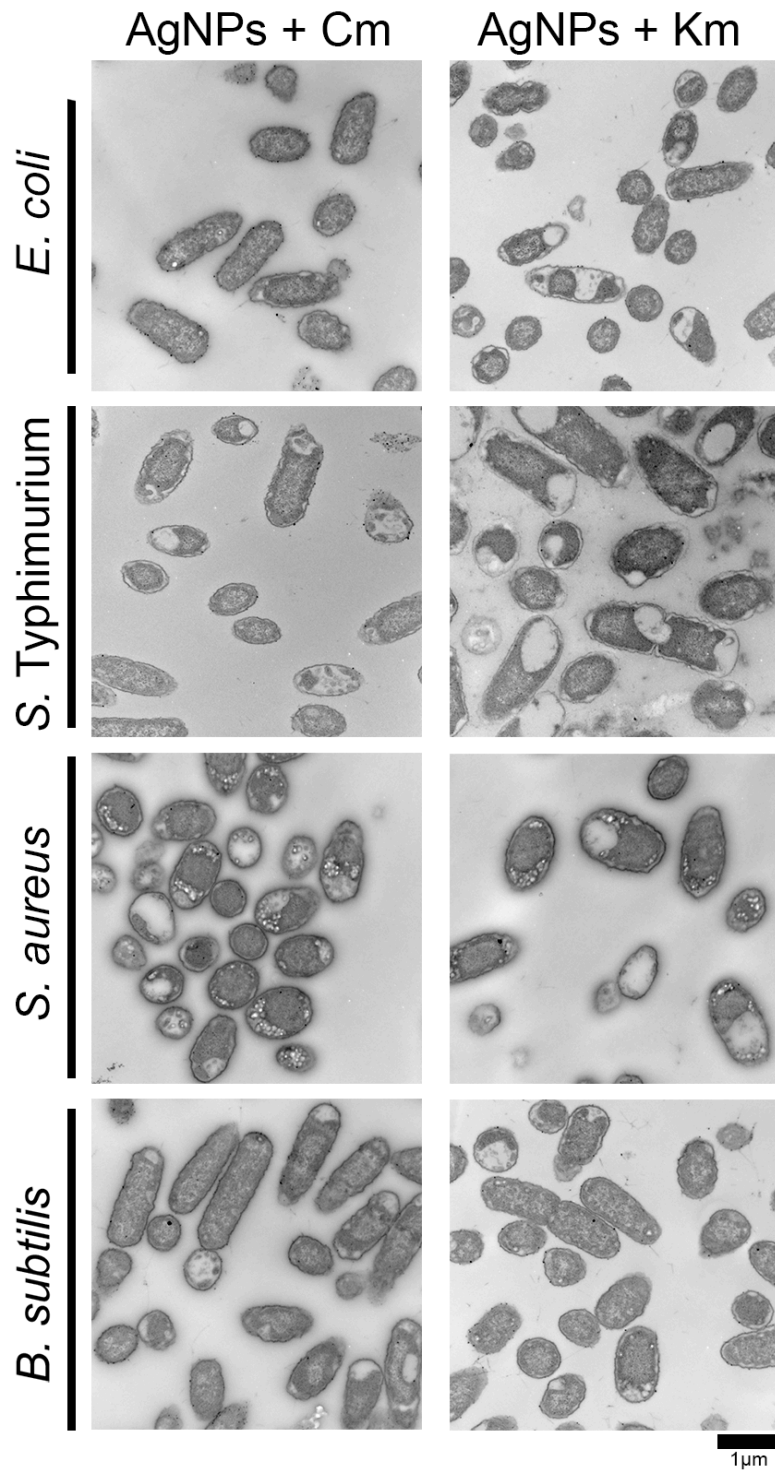

**S5 Fig. TEM images of bacterial cells exposed to sublethal concentrations of AgNPs and antibiotics. *E. coli*, *S. Typhimurium*, *S. aureus* and *B. subtilis* were exposed to combined treatments for 24 hr. Representative images are shown.**
