# Supplementary material for: Enhancement of antibiotics antimicrobial activity due to the silver nanoparticles impact on the cell membrane
Source: PubMed Central journal article supplement (PMC6839893; doi:10.1371/journal.pone.0224904), 2019-11-08
Supplement: pone.0224904.s006.pdf [file pone.0224904.s006.pdf]

| Strain                       | Cm   | Km   | Amp  | Bpm   | Azm  |
|------------------------------|------|------|------|-------|------|
| <b><i>E. coli</i></b>        | 0.35 | 0.05 | 1    | 0.02  | 0.05 |
| <b><i>S. Typhimurium</i></b> | 0.5  | 0.1  | 0.25 | 0.02  | 0.02 |
| <b><i>S. aureus</i></b>      | 0.05 | 16   | 0.25 | 0.02  | 0.02 |
| <b><i>B. subtilis</i></b>    | 8    | 0.12 | 0.05 | 0.005 | 16   |

Cm= chloramphenicol; Km= kanamycin; Amp= ampicillin; Bpm= biapenem, Azm= aztreonam.

**S1 Table. Antibiotic sub-lethal concentrations ( $\mu\text{g}\cdot\text{ml}^{-1}$ ).**
